# Supplementary material for: The Phytochemical Analysis of Vinca L. Species Leaf Extracts Is Correlated with the Antioxidant, Antibacterial, and Antitumor Effects
Source: MDPI journal article supplement (doi:10.3390/molecules26103040), 2021-05-19
Supplement: s1 [file s1]

# The Phytochemical Analysis of *Vinca* L. Species Leaf Extracts Is Correlated with the Antioxidant, Antibacterial, and Antitumor Effects

Alexandra Ciorîță <sup>1,2,\*</sup>, Cezara Zăgrean-Tuza <sup>3</sup>, Augustin C. Moț <sup>3</sup>, Rahela Carpa <sup>1</sup> and Marcel Pârvu <sup>1</sup>

<sup>1</sup> Faculty of Biology and Geology, Babeș-Bolyai University, 44 Republicii St., 400015 Cluj-Napoca, Romania; rahela.carpa@ubbcluj.ro (R.C.); marcel.parvu@ubbcluj.ro (M.P.)

<sup>2</sup> National Institute for Research and Development of Isotopic and Molecular Technologies, 67-103 Donath St., 400293 Cluj-Napoca, Romania

<sup>3</sup> Faculty of Chemistry and Chemical Engineering, Babeș-Bolyai University, 11 Arany János St., 400028 Cluj-Napoca, Romania; cezarazt7@gmail.com (C.Z.-T.); augustin.mot@ubbcluj.ro (A.C.M.)

\* Correspondence: alexandra.ciorita@itim-cj.ro

## Supplementary Methods

### Antioxidant activities

- ABTS (REAC method)

The ABTS anionic radical was prepared by treating 5 mM reduced ABTS with 50 nM zucchini peroxidase and 1.3 mM hydrogen peroxide in 50 mM sodium acetate buffer of 5.5 pH. Further, 290  $\mu$ L of the radical solution were pipetted along with 10  $\mu$ L of each extract in a 96-well plate. The reaction mixture was incubated for 30 min and the absorbance was recorded at 730 nm afterwards, with bleaching percentages calculated as previously described. Rutin (in 3–23  $\mu$ g/mL range) was used to obtain the calibration.

- CUPRAC

Neocuproine of 2 mM concentration, 1 mM pentahydrated CuSO<sub>4</sub>, and 1 M ammonium acetate in pH 7, were incubated for 10 min. Then, 190  $\mu$ L of this solution was mixed with 100  $\mu$ L ultrapure water and 10  $\mu$ L of each extract in a 96-well plate. After an additional 10 min of incubation, the 450 nm absorbance was recorded. A calibration curve with rutin (in 3–14  $\mu$ g/mL range) was obtained.

All reagents were acquired from Sigma-Aldrich and the absorbances were recorded using a Tecan Spark multiplate reader.

### Cytotoxicity assays

- MTT

After 48 h of incubation with the plant extracts, mitochondrial activity was assessed by MTT method. 3-(4,5-Dimethylthiazol-2-yl)-2,5-Diphenyltetrazolium Bromide solution (100  $\mu$ L) was added to each well in a final concentration of 0.5 mg/mL and left for incubation at 37 °C and 5% CO<sub>2</sub> for an additional 1.5 h. The resulted formazan was diluted in acidified iso-propanol and the absorbance was measured at 550 nm.

- LDH

50  $\mu$ L of culture media was subtracted from test plates and together with 50  $\mu$ L lithium lactate solution of 50 mM, 50  $\mu$ L tris solution of 200 mM, and 50  $\mu$ L of NAD solution (a mixture of ionitrotetrazolium violet, phenazine metosulphate, and nicotinamide dinucleotide) were added to a new 96 wells plate. The absorbance was read after 10 min at 490 nm and the background at 690 nm. The plate included also vehicle controls with media and each one of the extracts treated with LDH solution for the same amount of time to exclude possible errors.

- NO

Determination of nitric oxide (NO) concentration was done by Griess reaction. 50 µL of culture media was mixed with 50 µL sulphanilamide and the solution was kept in dark at room temperature for 10 min. *N*-(1-naphthyl)-ethylenediamine (N1-NAP) was added and the reaction was kept in dark at room temperature for 10 min. The samples were read at 540 nm.

All reagents used for cell toxicity assays were from Sigma-Aldrich (Germany), and the absorbances were read using BioTech Epoch plate reader and Gen5 software.

### **Ultrastructural analyses**

The ultrastructural modifications induced by the extracts were examined through transmission electron microscopy (TEM). The samples were incubated on glass slides at a confluence of  $3 \times 10^4$  cells/glass slide. The extracts were incubated with the cells at the median inhibitory concentration ( $IC_{50}$ ) value determined through MTT assay, for 24 h, at 37 °C and 5% CO<sub>2</sub>. After 24 h of incubation, the cells were fixed with 2.7 glutaraldehyde in 0.1 M phosphate buffer saline (PBS), for 1.5 h at 4 °C. After this, the slides were washed with PBS 4 times, one hour each, and post-fixed with osmium tetroxide for an additional hour. The samples were then washed four times with PBS (15 min each) and dehydrated with acetone in increasing concentrations (from 30% to 100%, each step for 15 min, at 4 °C). The glass slides were included in Epoxy resin Epon 812, upside down, so that the cells could be emerged in the resin. The infiltration took place for four hours (1:2, 1:1, 2:1, 1:0 with acetone) and the samples were then polymerized for 72 h at 60 °C. The slides were removed from the epoxy resin through thermic shock, by immersing the blocks in liquid nitrogen for two seconds. The ultrathin sections were obtained using Leica UC7 ultramicrotome (Leica, Germany), and the double stained sections (with uranyl acetate and lead citrate) were examined with TEM Jeol JEM 1010 (Jeol, Japan).

## Supplementary Figures and Tables

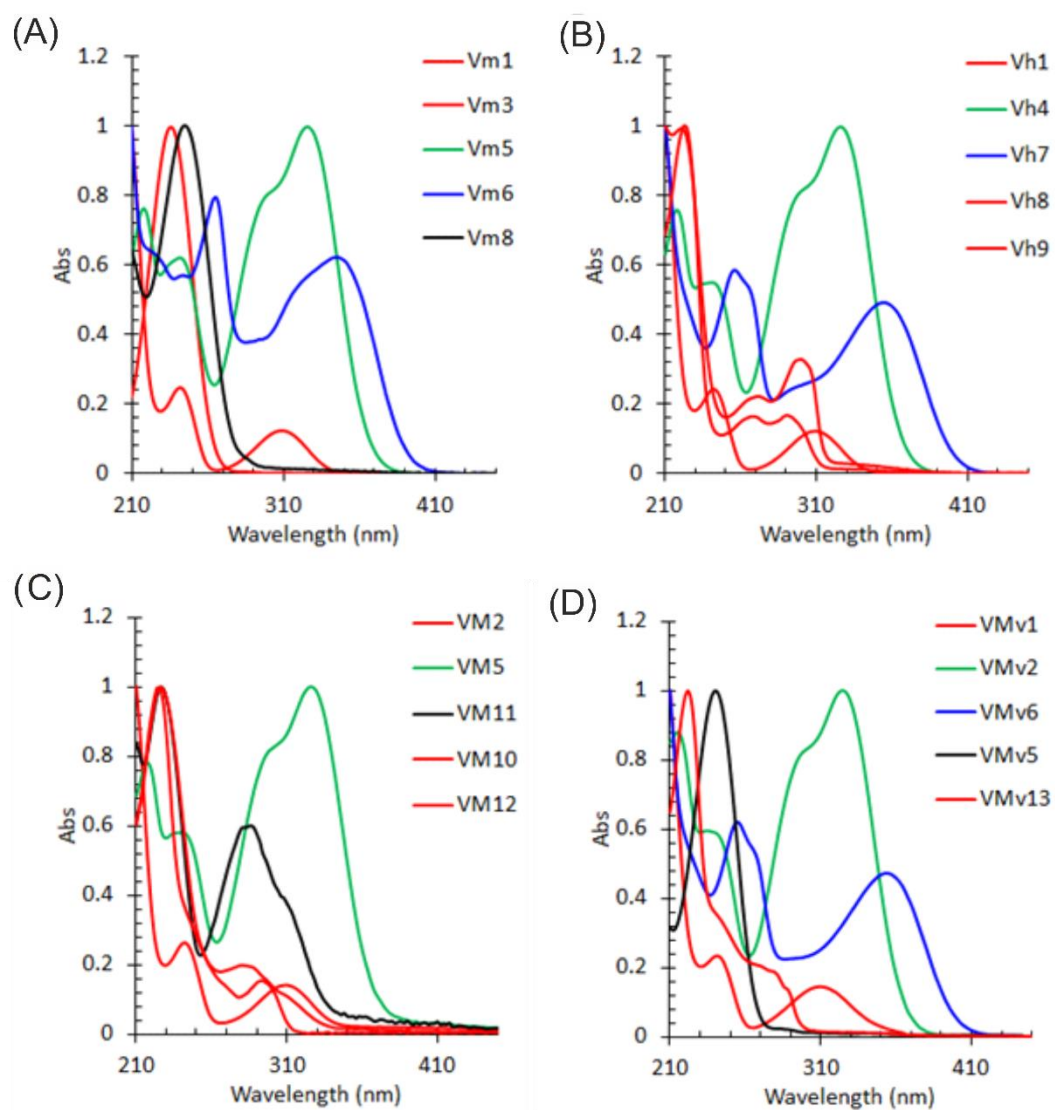

**Figure S1.** DAD UV-Vis molecular absorption spectra of representative compounds in the analyzed plant species extracts after chromatographic separation: (A) *Vinca minor* (Vm), (B) *Vinca herbacea* (Vh), (C) *Vinca major* (VM), (D) *Vinca major* var. *variegata* (VMv).

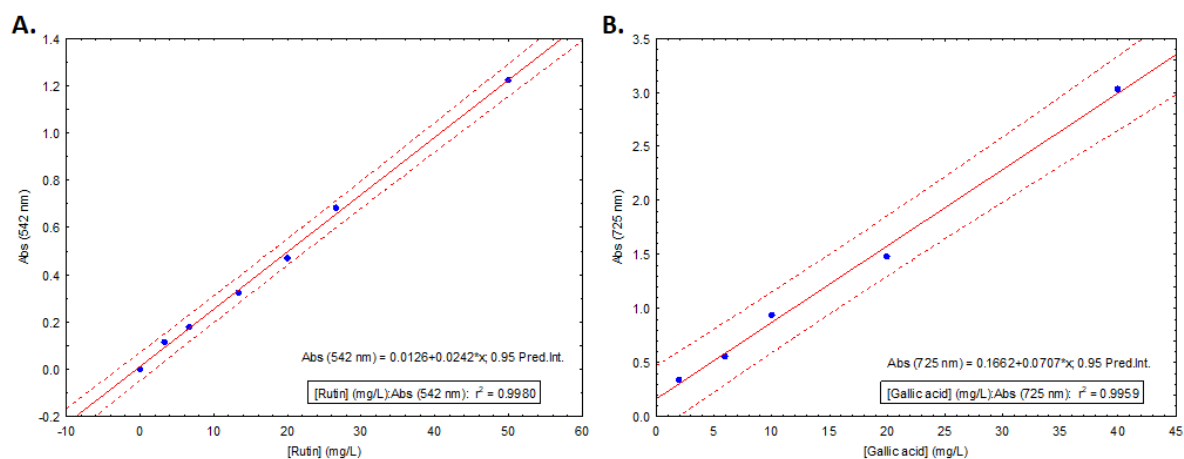

**Figure S2.** Calibration curves for rutin (TFC) and gallic acid (TPC).

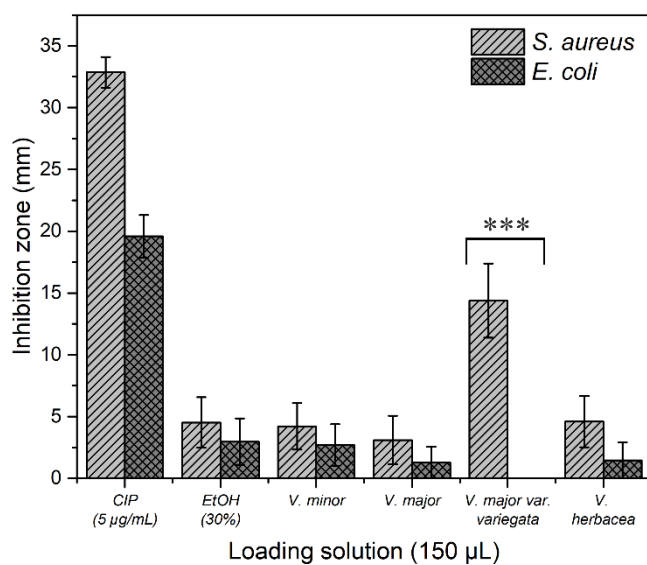

**Figure S3.** Graphical distribution of antibacterial activity assessed through agar well diffusion method. The values represent the mean of six individual experiments  $\pm$  standard error of the mean; CIP = ciprofloxacin, EtOH = ethanol; Student's t test was performed to determine if the Gram-positive strain, *S. aureus*, is affected differently from the Gram-negative strain, *E. coli*; \*\*\*  $p < 0.0001$ .

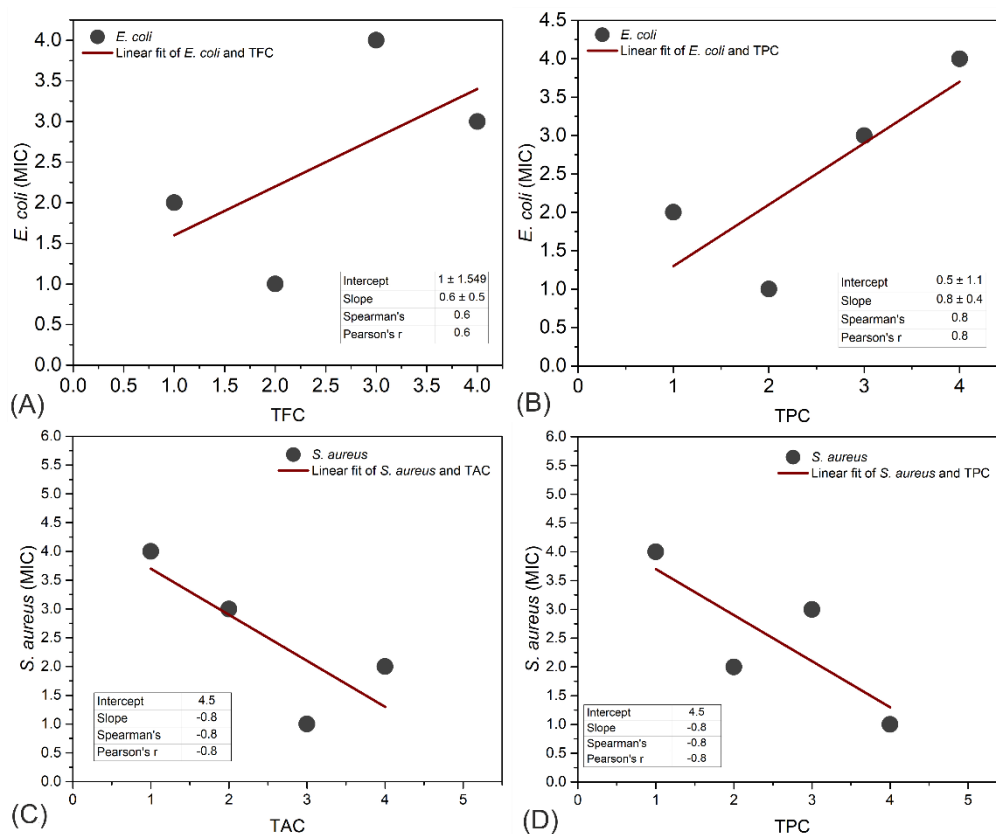

**Figure S4.** The total flavonoid (A) and polyphenol (B) content of the analyzed *Vinca* extracts is represented in relation to the ranked effects of the extracts against *E. coli*; The total alkaloid (C) and polyphenol (D) content represented in relation to the ranked effects of the extracts against *Staphylococcus aureus*.

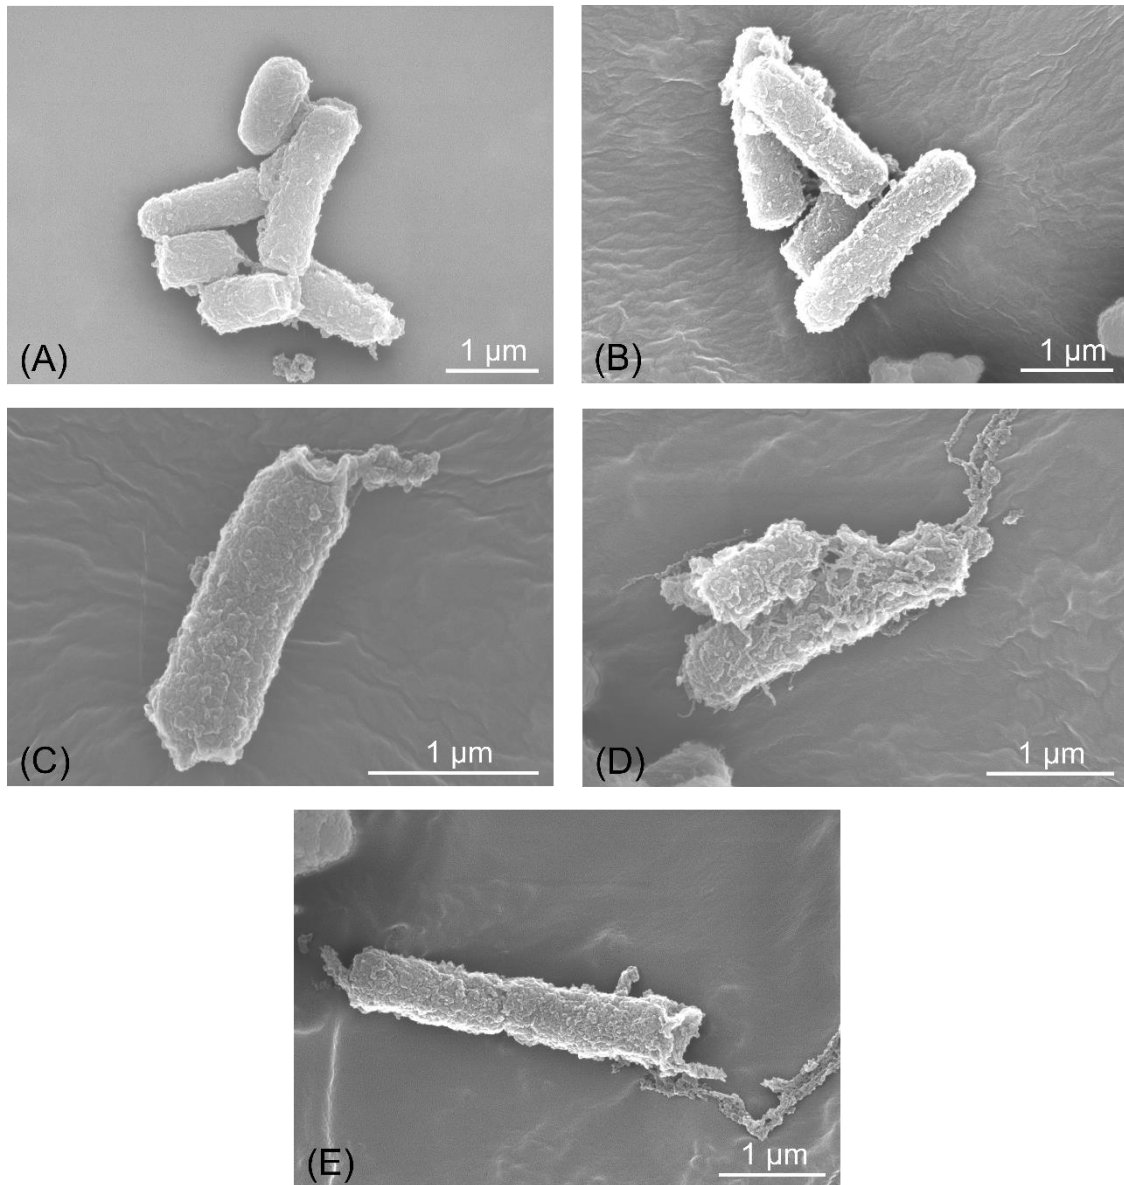

**Figure S5.** SEM micrographs of *E. coli* cells treated with *Vinca* leaf extracts at Minimal Inhibitory Concentration (MIC) values. (A) untreated control, treated with (B) *V. minor*, (C) *V. major*, (D) *V. major* var. *variegata*, (E) *V. herbacea*.

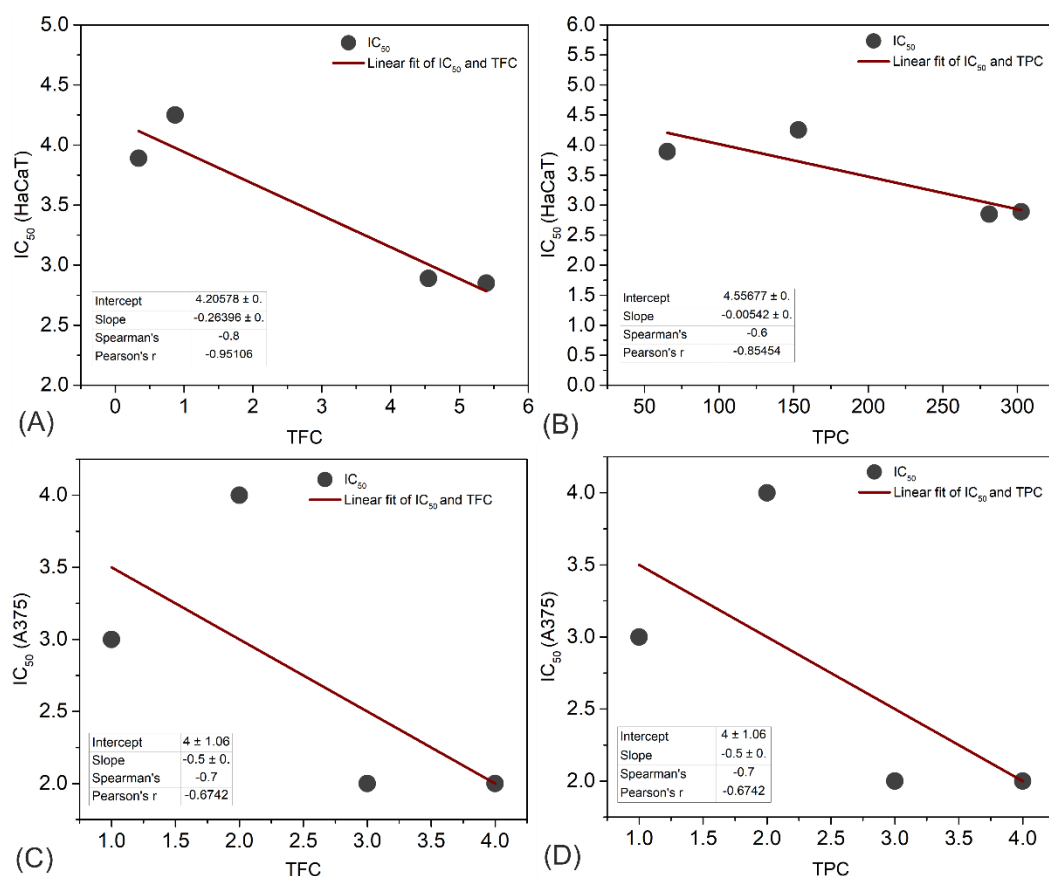

**Figure S6.** The total flavonoid (A) and polyphenol (B) content of the analyzed extracts represented in relation to the IC<sub>50</sub> values observed against the HaCaT cells. The total flavonoid (C) and polyphenol (D) content of the analyzed extracts represented in relation to the IC<sub>50</sub> values observed against the A375 cells.

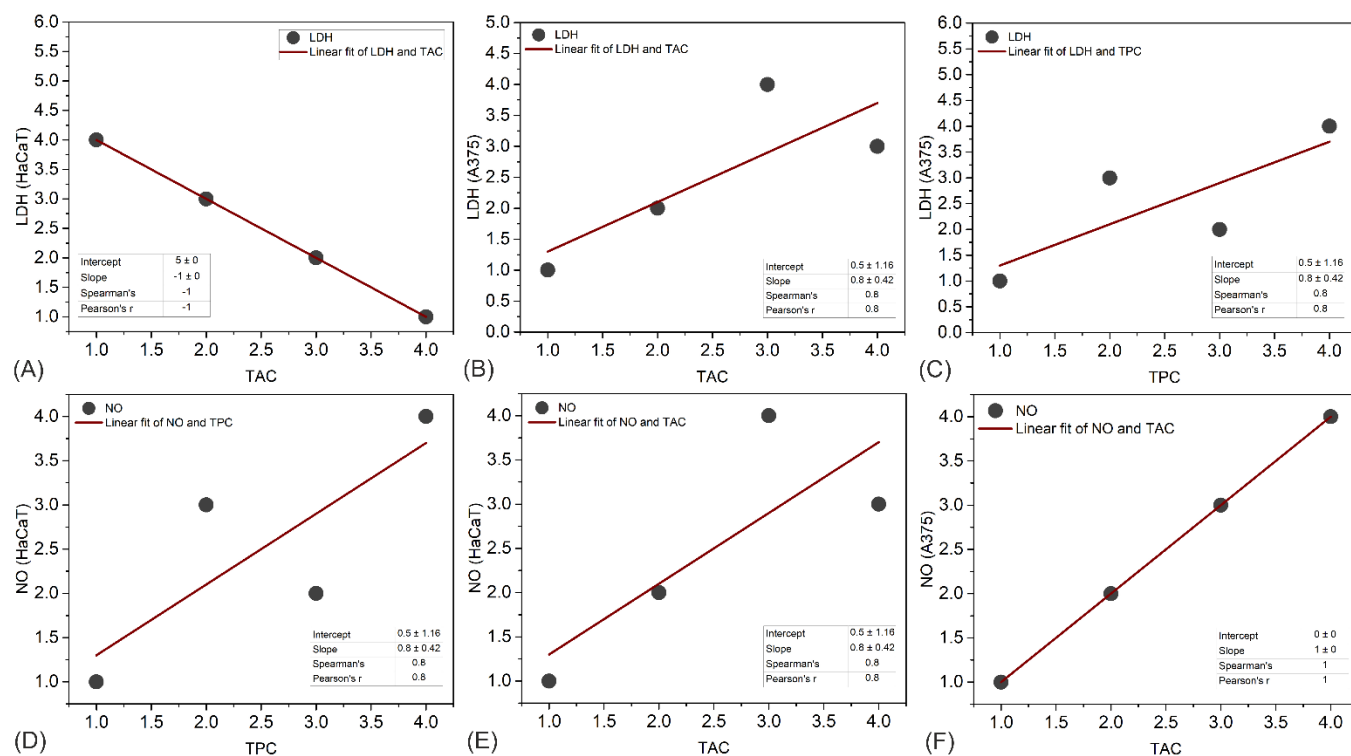

**Figure S7.** LDH release expressed in relation to the total alkaloid content in HaCaT cells (A) and A375 cells (B). The LDH release expressed in relation to the total polyphenol content in A375 cells (C). NO concentration expressed in



relation to the total polyphenol content (D) and total alkaloid content (E) in HaCaT cells. NO concentration expressed in relation to the total alkaloid content in A375 cells (F).

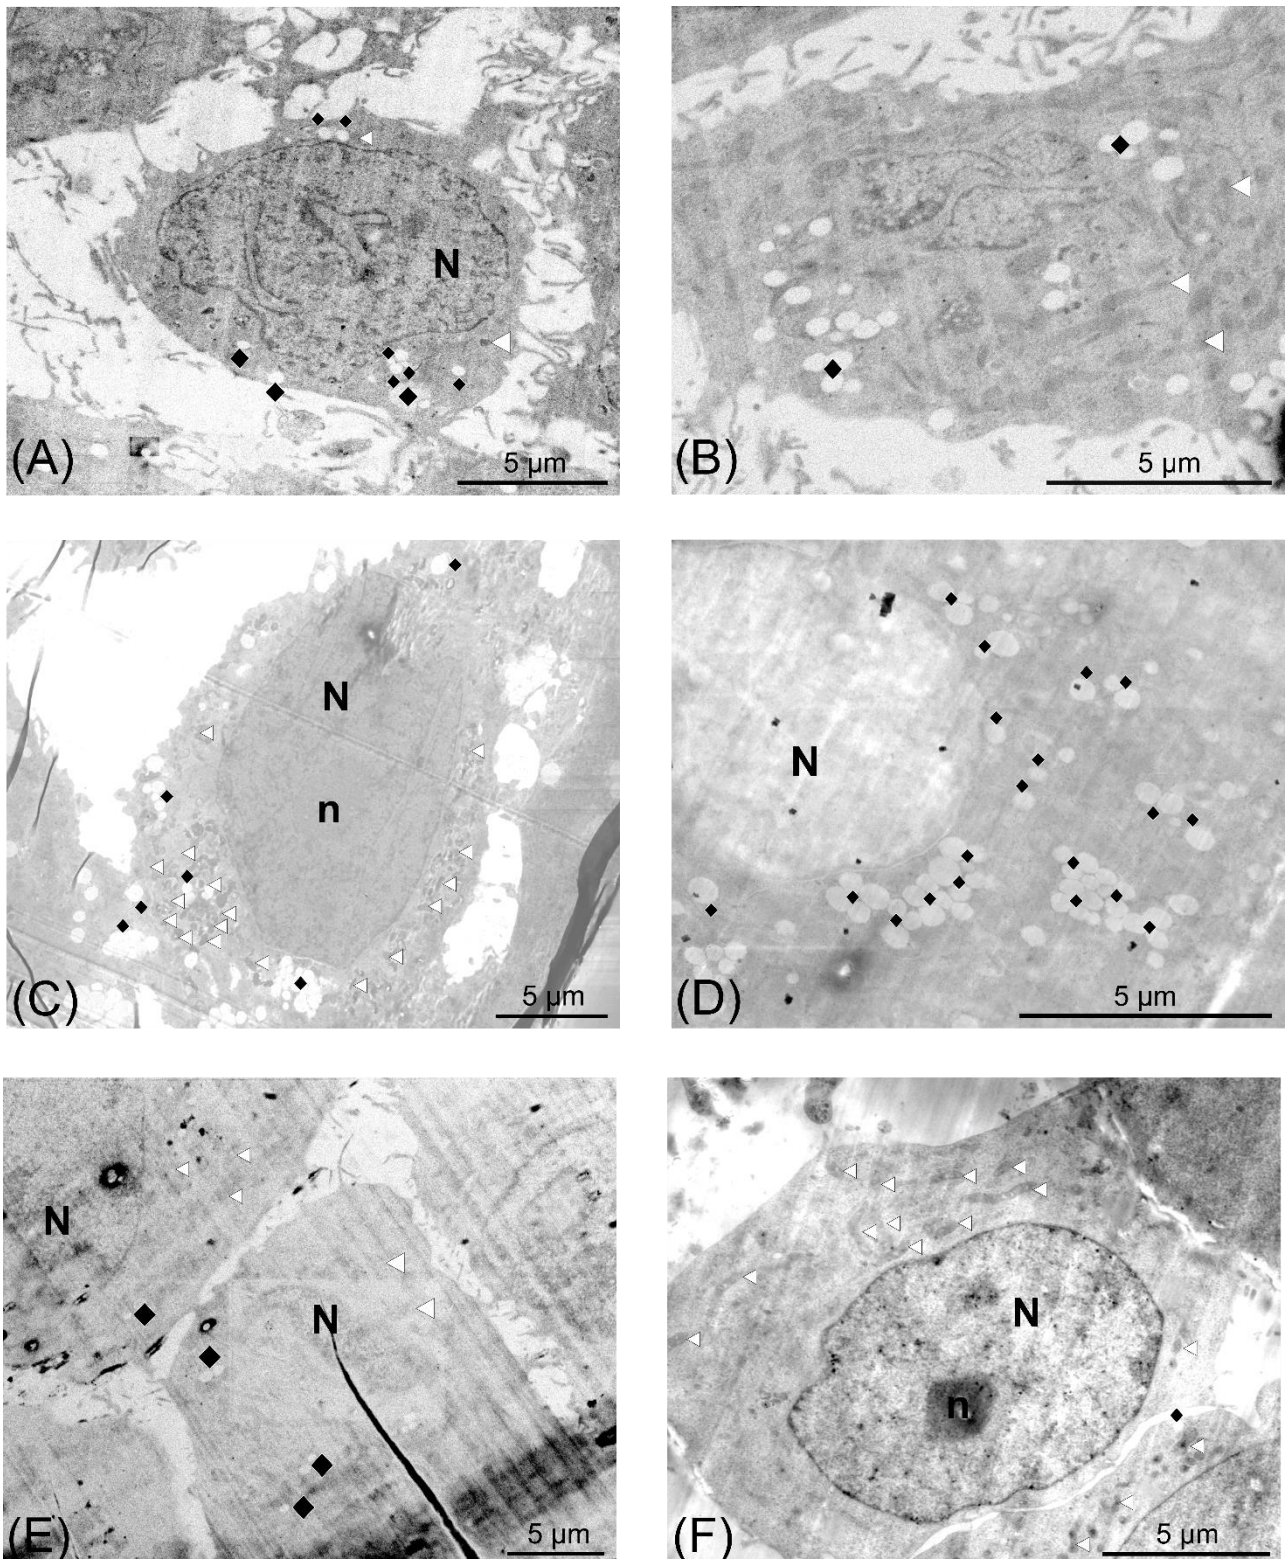

**Figure S8.** TEM micrographs of the HaCaT keratinocytes treated with *Vinca* extracts. (A–B) untreated control, treated with (C) *V. minor*, (D) *V. major*, (E) *V. major* var. *variegata*, and (F) *V. herbacea*. White triangles = mitochondria, black rhombs = vesicles, N = nucleus, n = nucleolus.



**Table S1.** Retention time, spectral features, phytochemical group, and chromatographic area (at 230 nm) for the peaks that were chemometrically analysed. Phytochemical group (Gr.) was attributed after PCA analysis based on spectral similarities. Standards were also included

| Label | t <sub>R</sub><br>(min) | Spectral<br>Features<br>(nm) | Gr.  | Peak<br>Area<br>(%) | Label              | t <sub>R</sub><br>(min) | Spectral<br>Features<br>(nm) | Gr. | Peak<br>Area<br>(%) |
|-------|-------------------------|------------------------------|------|---------------------|--------------------|-------------------------|------------------------------|-----|---------------------|
| Vm1   | 6.796                   | 242, 310                     | Alk  | 6.36                | VMv3               | 7.185                   | 242, 310                     | Alk | 2.29                |
| Vm2   | 7.199                   | 242, 310                     | Alk  | 7.25                | VMv4               | 7.516                   | 236                          | Alk | 3.99                |
| Vm3   | 7.516                   | 236                          | Alk  | 8.85                | VMv5               | 8.492                   | 240                          | Bz  | 3.98                |
| Vm4   | 8.940                   | 234                          | Alk  | 10.90               | VMv6               | 9.015                   | 254, 354                     | Flv | 3.72                |
| Vm5   | 9.512                   | 242, 326                     | Cin  | 13.76               | VMv7               | 9.496                   | 240, 326                     | Cin | 12.94               |
| Vm6   | 10.439                  | 266, 346                     | Flv  | 1.23                | VMv8               | 9.738                   | 236, 326                     | Cin | 3.40                |
| Vm7   | 12.976                  | 236                          | Alk  | 11.11               | VMv9               | 9.823                   | 266, 332                     | Flv | 4.06                |
| Vm8   | 14.455                  | 244                          | Bz   | 1.42                | VMv10              | 10.427                  | 266, 346                     | Flv | 1.78                |
| Vh1   | 6.706                   | 242, 310                     | Alk  | 5.59                | VMv11              | 10.726                  | 236                          | Alk | 1.88                |
| Vh2   | 7.113                   | 242, 310                     | Alk  | 6.23                | VMv12              | 12.799                  | 266, 344                     | Flv | 2.43                |
| Vh3   | 7.456                   | 236                          | Alk  | 11.35               | VMv13              | 19.064                  | 222, 275                     | Alk | 2.54                |
| Vh4   | 9.469                   | 242, 326                     | Cin  | 7.65                | VMv14              | 20.250                  | 226, 275                     | Alk | 1.66                |
| Vh5   | 9.702                   | 240, 326                     | Cin  | 3.47                | VMv15              | 24.191                  | 224, 294                     | Alk | 1.99                |
| Vh6   | 12.648                  | 246, 316                     | Alk  | 8.71                | dihydroxybenzoic   | 6.682                   | 260, 294                     | Bz  | -                   |
| Vh7   | 14.059                  | 256, 354                     | Flv  | 9.33                | chlorogenic        | 9.507                   | 240, 326                     | Cin | -                   |
| Vh8   | 16.380                  | 272, 300                     | Alk  | 3.01                | hydroxybenzoic     | 9.721                   | 256                          | Bz  | -                   |
| Vh9   | 19.408                  | 268, 290                     | Alk  | 2.44                | caffeic            | 11.063                  | 238, 324                     | Cin | -                   |
| VM1   | 6.984                   | 242, 310                     | Bz   | 2.01                | syringic           | 11.519                  | 274                          | Bz  | -                   |
| VM2   | 7.215                   | 242, 310                     | Alk  | 7.65                | rutin              | 14.090                  | 256, 354                     | Flv | -                   |
| VM3   | 7.548                   | 236                          | Bz   | 5.31                | <i>p</i> -coumaric | 14.260                  | 226, 310                     | Cin | -                   |
| VM4   | 8.510                   | 240, 372                     | Bz   | 5.82                | isoquercitrin      | 14.893                  | 256, 354                     | Flv | -                   |
| VM5   | 9.520                   | 240, 326                     | Cin  | 6.05                | ferulic            | 15.405                  | 236, 322                     | Cin | -                   |
| VM6   | 10.724                  | 238, 336                     | Flv  | 1.94                | quercitrin         | 16.587                  | 256, 350                     | Flv | -                   |
| VM7   | 13.041                  | 238, 330                     | n.a. | 1.92                | myricetin          | 18.292                  | 254, 372                     | Flv | -                   |
| VM8   | 14.677                  | 222, 298                     | n.a. | 1.02                | berbamine          | 18.726                  | 282                          | Alk | -                   |
| VM9   | 19.069                  | 222, 275                     | Alk  | 2.70                | vincamine          | 20.634                  | 222, 270                     | Alk | -                   |
| VM10  | 20.249                  | 226, 280                     | Alk  | 5.16                | quercetin          | 22.426                  | 254, 370                     | Flv | -                   |
| VM11  | 20.670                  | 226, 286                     | Bz   | 1.86                | kaempferol         | 30.058                  | 264, 366                     | Flv | -                   |
| VM12  | 24.219                  | 224, 294                     | Alk  | 3.64                | vinblastine        | 31.744                  | 216, 268                     | Alk | -                   |
| VMv1  | 5.760                   | 242,310                      | Alk  | 1.00                | galangin           | 35.272                  | 310, 358                     | Flv | -                   |
| VMv2  | 6.974                   | 236, 324                     | Cin  | 5.12                |                    |                         |                              |     |                     |

\*Vm = *V. minor*, VM = *V. major*, VMv = *V. major* var. *variegata*, Vh = *V. herbacea*, Alk = alkaloid, Flv = flavonoid, Bz = hydroxybenzoic acid, Cin = hydroxycinnamic acid, - = not detected.
